# Supplementary material
Source: PubMed Central journal article supplement (PMC7655266)
Supplement: 17-01179.pdf [file 17-01179.pdf]

**On-line Table 1: Check points of quality assessment in this study**

| Category                       | Check Point                                                                                                                                                                                                                                                                                                                                                                                                                                                                                                                                                                                                                                                                                                                                                                                                                                                                                                                   | Score (0–2) |
|--------------------------------|-------------------------------------------------------------------------------------------------------------------------------------------------------------------------------------------------------------------------------------------------------------------------------------------------------------------------------------------------------------------------------------------------------------------------------------------------------------------------------------------------------------------------------------------------------------------------------------------------------------------------------------------------------------------------------------------------------------------------------------------------------------------------------------------------------------------------------------------------------------------------------------------------------------------------------|-------------|
| Scientific design <sup>a</sup> | <ol style="list-style-type: none"> <li>1) Study objective definition</li> <li>2) Study design: prospective (2 points), retrospective (1 point), not defined (0 points)</li> <li>3) Outcome definition</li> <li>4) Statistical considerations (fully reported with a preliminary assessment of the patient/sample number to be included and/or analyzed [2 points]; patient/sample number to be included and/or analyzed justified by the number of studied variables [minimum 10 patients per variable] [1 point]; not defined [0 points])</li> </ol>                                                                                                                                                                                                                                                                                                                                                                         |             |
| Generalizability <sup>a</sup>  | <ol style="list-style-type: none"> <li>5) Statistical methods and test description</li> <li>1) Patient selection criteria, including histologic type, disease stage, and treatment</li> <li>2) Patient characteristics, including histology type, disease stage, and treatment</li> <li>3) Initial work-up</li> <li>4) Treatment description</li> <li>5) Number of ineligible patients with exclusion causes</li> </ol>                                                                                                                                                                                                                                                                                                                                                                                                                                                                                                       |             |
| Results analysis <sup>a</sup>  | <ol style="list-style-type: none"> <li>1) Follow-up description, including the number of events</li> <li>2) Survival analysis according to the tumor-to-normal cortex ratio and/or metabolic tumor volume</li> <li>3) Univariate analysis of the prognostic factors for survival: report of the relative risk with the confidence interval (2 points), results without evaluation of the relative risk and its confidence interval (1 point), not reported or inadequate (0 points)</li> <li>4) Multivariate analysis of the prognostic factors for survival: report the relative risk with the confidence interval (2 points), results without evaluation of the relative risk and its confidence interval (1 point), not reported or inadequate (0 points)</li> <li>5) The analysis of the relationship between TNR and/or MTV was performed without knowledge of survival results and conversely (double blind)</li> </ol> |             |
| PET report <sup>a</sup>        | <ol style="list-style-type: none"> <li>1) Patient characteristics: weight/height, blood sugar level, histologic subtype</li> <li>2) MET PET acquisition protocol characteristics: fasting duration, injected dose of MET, delay between injection and data acquisition</li> <li>3) Technical parameters: investigation area, delay between CT and PET acquisition, standard uptake value formula, type of SUV, TNR and/or MTV formula; type of PET engine, duration of emission time; duration of transmission time, attenuation and reconstruction parameters</li> <li>4) TNR and/or MTV cutoff definition</li> </ol>                                                                                                                                                                                                                                                                                                        |             |

**Note:**—MET indicates <sup>11</sup>C-methionine.

<sup>a</sup> Score of 10.

**On-line Table 2: Characteristics of the included studies**

| No. | Study                         | Year | Country       | Patient No. | Glioma Grade | Treatment before MET PET                          | Major Treatment after MET PET                      | End Point  | PET Parameters | Tumor Parameter | Reference Parameter | Cutoffs of TNR | Cutoffs of MTV (cm <sup>3</sup> ) |
|-----|-------------------------------|------|---------------|-------------|--------------|---------------------------------------------------|----------------------------------------------------|------------|----------------|-----------------|---------------------|----------------|-----------------------------------|
| 1   | Kaschten et al <sup>24</sup>  | 1998 | Belgium       | 41          | Low-high     | None                                              | Operation (± radiotherapy)                         | OS         | TNR            | SUVmax          | SUVmean             | 2.1            | (-)                               |
| 2   | Ribom et al <sup>25</sup>     | 2001 | Sweden        | 68          | Low          | None                                              | Operation and/or radiotherapy                      | OS         | TNR            | SUVmax          | SUVmean             | 2.0 and 2.2    | (-)                               |
| 3   | de Witte et al <sup>26</sup>  | 2001 | Belgium       | 85          | Low-high     | None or operation with radiotherapy               | Operation and/or radiotherapy                      | OS         | TNR            | SUVmax          | SUVmean             | 2.2 and 2.8    | (-)                               |
| 4   | Nariai et al <sup>28</sup>    | 2005 | Japan         | 65          | Low-high     | None                                              | Unknown                                            | OS         | TNR            | SUVmax          | Not definite        | 1.706          | (-)                               |
| 5   | Van Laere et al <sup>27</sup> | 2005 | Belgium       | 30          | Low-high     | Operation and/or radiotherapy and/or chemotherapy | Operation and/or radiotherapy and/or chemotherapy  | OS         | TNR            | SUVmax          | SUVmean             | 2.0            | (-)                               |
| 6   | Ribom et al <sup>29</sup>     | 2005 | Sweden        | 27          | Low          | None                                              | Operation                                          | EFS        | TNR            | SUVmax          | Not definite        | 2.0 and 2.2    | (-)                               |
| 7   | Galldiks et al <sup>30</sup>  | 2006 | Germany       | 15          | High         | None                                              | Chemotherapy                                       | EFS and OS | TNR            | SUVmax          | SUVmean             | 1.8            | (-)                               |
| 8   | Smits et al <sup>31</sup>     | 2008 | Sweden        | 129         | Low          | None                                              | Operation (± radiotherapy and/or chemotherapy)     | OS         | TNR            | SUVmax          | SUVmean             | 2.1            | (-)                               |
| 9   | Galldiks et al <sup>32</sup>  | 2012 | Germany       | 40          | High         | None                                              | Unknown                                            | EFS and OS | TNR and MTV    | SUVmax          | SUVmean             | 2.6            | 43                                |
| 10  | Singhal et al <sup>33</sup>   | 2012 | United States | 102         | Low-high     | None                                              | Unknown                                            | OS         | TNR            | SUVmean         | SUVmean             | 1.51           | (-)                               |
| 11  | Kobayashi et al <sup>34</sup> | 2015 | Japan         | 33          | Low-high     | None                                              | Operation (± CCRT)                                 | OS         | TNR and MTV    | SUVmax          | SUVmean             | 3.42           | 59.95                             |
| 12  | Yoo et al <sup>35</sup>       | 2015 | South Korea   | 30          | High         | None                                              | Operation and following CCRT                       | EFS        | TNR and MTV    | SUVmax          | SUVmean             | 3.3            | 35                                |
| 13  | Takano et al <sup>36</sup>    | 2016 | Japan         | 35          | Low-high     | None                                              | Operation (± radiotherapy or chemotherapy or CCRT) | EFS        | TNR            | SUVmax          | SUVmax              | 2.0            | (-)                               |
| 14  | Jung et al <sup>37</sup>      | 2017 | South Korea   | 35          | High         | Operation (± CCRT or radiotherapy)                | Unknown                                            | OS         | TNR and MTV    | SUVmax          | SUVmax              | 2.8            | 60                                |

**Note:**—CCRT indicates concurrent chemoradiation therapy; (-), value not provided; MET, <sup>11</sup>C-methionine.

**On-line Table 3: Quality assessment of included studies**

| No. | Author                        | Global Score (%) | Scientific Design <sup>a</sup> | Generalizability <sup>a</sup> | Results Analysis <sup>a</sup> | PET Report <sup>a</sup> |
|-----|-------------------------------|------------------|--------------------------------|-------------------------------|-------------------------------|-------------------------|
| 1   | Kaschten et al <sup>24</sup>  | 50               | 4                              | 7                             | 4                             | 5                       |
| 2   | Ribom et al <sup>25</sup>     | 70               | 8                              | 7                             | 8                             | 5                       |
| 3   | de Witte et al <sup>26</sup>  | 43.8             | 4                              | 7                             | 4                             | 2.5                     |
| 4   | Nariai et al <sup>28</sup>    | 41.9             | 6                              | 4                             | 3                             | 3.8                     |
| 5   | Van Laere et al <sup>27</sup> | 66.9             | 5                              | 7                             | 6                             | 8.8                     |
| 6   | Ribom et al <sup>29</sup>     | 57.5             | 6                              | 7                             | 5                             | 5                       |
| 7   | Galldiks et al <sup>30</sup>  | 60               | 7                              | 7                             | 5                             | 5                       |
| 8   | Smits et al <sup>31</sup>     | 62.5             | 8                              | 7                             | 5                             | 5                       |
| 9   | Galldiks et al <sup>32</sup>  | 55.6             | 7                              | 4                             | 5                             | 6.3                     |
| 10  | Singhal et al <sup>33</sup>   | 53.8             | 6                              | 4                             | 4                             | 7.5                     |
| 11  | Kobayashi et al <sup>34</sup> | 58.1             | 5                              | 7                             | 5                             | 6.3                     |
| 12  | Yoo et al <sup>35</sup>       | 71.3             | 7                              | 7                             | 7                             | 7.5                     |
| 13  | Takano et al <sup>36</sup>    | 63.8             | 7                              | 7                             | 4                             | 7.5                     |
| 14  | Jung et al <sup>37</sup>      | 56.3             | 5                              | 4                             | 6                             | 7.5                     |

<sup>a</sup> Score of 10.

**On-line Table 4: Summary of direct comparison studies between TNR and MTV**

| Author                        | Year | No. | End Point  | Tumor Grade | Tumor Stage | Reference for TNR                      | Significance of TNR                 | Reference for MTV                            | Significance of MTV             |
|-------------------------------|------|-----|------------|-------------|-------------|----------------------------------------|-------------------------------------|----------------------------------------------|---------------------------------|
| Galldiks et al <sup>32</sup>  | 2012 | 40  | EFS and OS | High        | Primary     | SUVmean of normal contralateral cortex | Not significant for both EFS and OS | 1.3 × SUVmean of normal contralateral cortex | Significant for both EFS and OS |
| Kobayashi et al <sup>34</sup> | 2015 | 33  | OS         | Low-high    | Primary     | SUVmean of normal contralateral cortex | Not significant for OS              | 1.3 × SUVmean of normal contralateral cortex | Significant for OS              |
| Yoo et al <sup>35</sup>       | 2015 | 30  | EFS        | High        | Primary     | SUVmean of normal contralateral cortex | Not significant for EFS             | 1.3 × SUVmean of normal contralateral cortex | Significant for EFS             |
| Jung et al <sup>37</sup>      | 2017 | 35  | OS         | High        | Recurrence  | SUVmax of normal contralateral cortex  | Not significant for OS              | SUVmax of normal contralateral cortex        | Significant for OS              |
